# Supplementary material for: Global impact of nitrate photolysis in sea-salt aerosol on NO x , OH, and O 3 in the marine boundary layer
Source: Copernicus journal article supplement (doi:10.5194/acp-18-11185-2018), 2018-08-10
Supplement: Supplementary file 1 [file acp-18-11185-2018-supplement.pdf]

Supplement of Atmos. Chem. Phys., 18, 11185–11203, 2018  
<https://doi.org/10.5194/acp-18-11185-2018-supplement>  
© Author(s) 2018. This work is distributed under  
the Creative Commons Attribution 4.0 License.

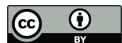

*Supplement of*

## **Global impact of nitrate photolysis in sea-salt aerosol on $\text{NO}_x$ , OH, and $\text{O}_3$ in the marine boundary layer**

**Prasad Kasibhatla et al.**

*Correspondence to:* Prasad Kasibhatla (psk9@duke.edu)

The copyright of individual parts of the supplement might differ from the CC BY 4.0 License.

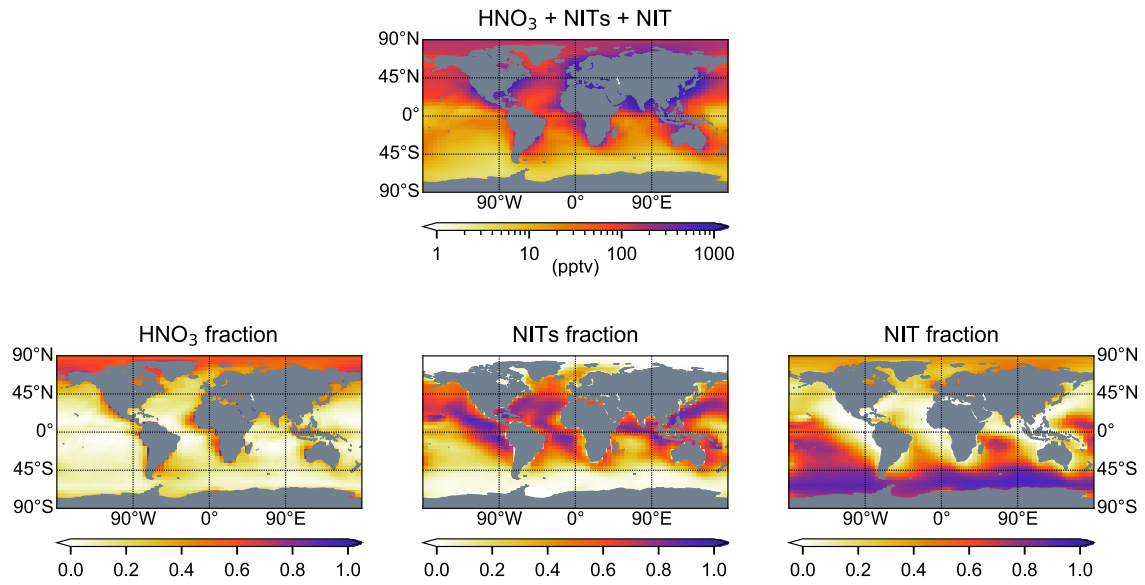

5 Figure S1: Simulated 2014-2015 boundary layer-average (average over bottom 1 km) total gas- and aerosol-phase nitrate (top panel), and fraction of total that is in the gas-phase (bottom left panel), in coarse-mode SSA (bottom middle panel), and in accumulation-mode aerosol (bottom right panel) for the updated model.

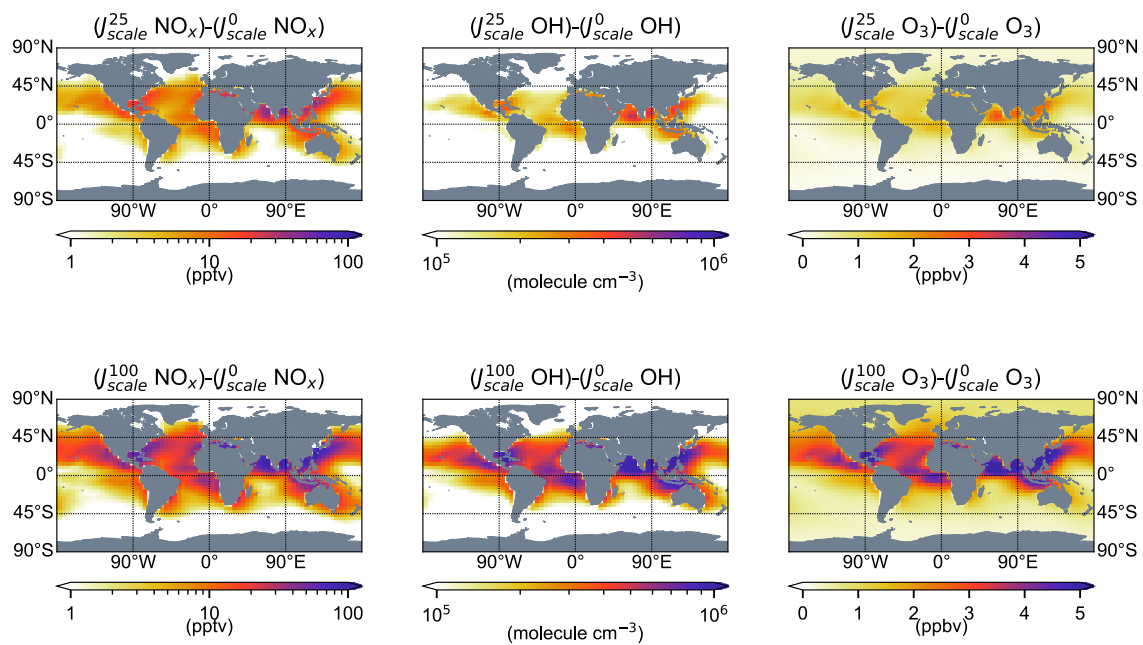

Figure S2: Simulated increases in 2014-2015 MBL-average (average over bottom 1 km)  $\text{NO}_x$  (left panels), OH (middle panels) and  $\text{O}_3$  (right panels) for the  $J_{scale}^{25}$  (top panels) and  $J_{scale}^{100}$  (bottom panels) model runs relative to the  $J_{scale}^0$  model run.
